# Supplementary material
Source: ML conference proceedings conference paper supplement (https://openaccess.thecvf.com/content/CVPR2024/html/Guo_JoAPR_Cleaning_the_CVPR_2024_paper.html)
Supplement: Supplementary file [file Guo_JoAPR_Cleaning_the_CVPR_2024_supplemental.pdf]

# JoAPR: Cleaning the Lens of Prompt Learning for Vision-Language Models

## Supplementary Material

### A. Algorithm

The algorithm for JoAPR is as follows:

---

**Algorithm 1** JoAPR Training Process

---

**Input:** Training dataset  $\bar{D} : \{(X_i, \bar{Y}_i)\}_{i=1}^N$

- 1: Warmup the model using  $\mathcal{L}_{Warmup}$ ;
  - 2: **for**  $n = 1:\text{Max\_epoch}$  **do**
  - 3:   Fit the  $\mathcal{L}_{Divide}$  using GMM;
  - 4:   Determine thresholds  $\theta_1$  and  $\theta_2$ ;
  - 5:    $D_c : \{(X_i^c, Y_i^c) \mid \mathcal{L} < \theta_1 \text{ or } p(g_{clean}|\mathcal{L}) > \theta_2\}_{i=1}^{N_c}$
  - 6:    $D_n : \{(X_i^n) \mid \mathcal{L} > \theta_1 \text{ and } p(g_{clean}|\mathcal{L}) < \theta_2\}_{i=1}^{N_n}$
  - 7:   **for**  $m = 1:\text{num\_steps}$  **do**
  - 8:     Augment data as per Eq. (8);
  - 9:     Refurbish labels using Eqs. (9) and (10), yielding  $\hat{D}$ ;
  - 10:      $\tilde{D}' = \text{MixMatch}(\hat{D})$
  - 11:     Retrain model with  $\tilde{D}'$  using  $\mathcal{L}_{Retrain}$ ;
  - 12:     Update prompt using gradient backpropagation;
  - 13:   **end for**
  - 14: **end for**
  - 15: Maximize  $P(\bar{Y}|X) \rightarrow \text{Maximize } P(\tilde{Y}'|X)$
- 

### B. Potential Issues with the Compensation Term

Figure 3 indicates that in few-shot datasets with a limited number of samples and high noise levels, the penalty term can lead to a highly discrete distribution of loss values. Alternatively, it may result in many noisy samples exhibiting very low loss values, to the extent that the loss values from noisy samples completely overshadow the distribution of clean samples. The inclusion of a compensation term aids in clustering the loss value distribution more tightly, narrowing the gap between the maximum and minimum loss values. This clustering increases the mean loss values for both clean and noisy data, thereby reducing their distribution overlap to a certain degree. However, in few-shot datasets with a larger number of samples, this approach could have negative consequences. As shown in Fig. 6, under conditions of a large sample size and high noise, the compensation term causes the loss value distribution of clean samples to more closely resemble that of noisy samples, leading to increased overlap. This phenomenon explains why JoAPR\* tends to perform better than JoAPR in few-shot datasets with a greater number of samples.

### C. Experiments on FGVCaircraft

Prompt learning methods often exhibit lower performance on this dataset. Hence, we consider it more essential to im-

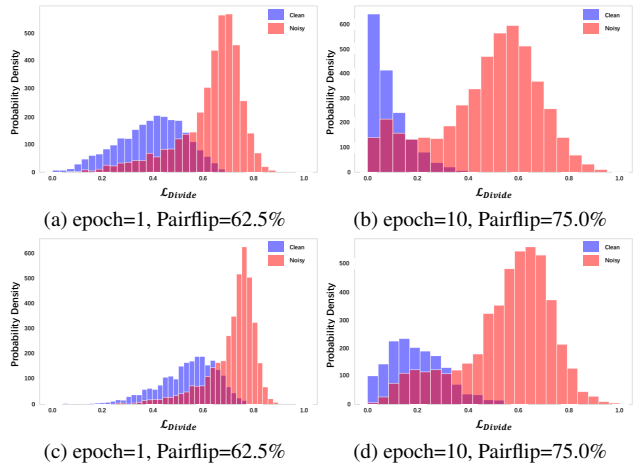

Figure 6. Pairflip noise injection into the SUN397 dataset is depicted with blue indicating clean data and red signifying noisy data. Figures (a) and (b) illustrate the probability density distribution when fitting the  $\mathcal{L}_{Divide}$  without incorporating the compensation term. Conversely, figures (c) and (d) display the distribution with the compensation term included in the  $\mathcal{L}_{Divide}$  fitting process.

prove prompt learning performance on this dataset rather than robustness. Nevertheless, our experiments on FGVCaircraft yield improvements, with a 3.8% and 3.1% increase in accuracy under 50% Symflip and Pairflip noise, respectively. It is crucial to note that even when dealing with a completely clean FGVCaircraft dataset devoid of any label noise, achieving a satisfactory model fit remains challenging. Hence, we implement 150 epochs of Warmup and employ GCE during this phase to mitigate overfitting to noisy data.

### D. More Analysis about JoAPR under 100% Noise

Our framework excels under 100% noise due to CLIP’s inherent prior knowledge and powerful zero-shot learning ability, which allows us to accurately predict clean labels using model predictions. And that is why we adopt a refurbishment strategy for prompt learning for VL-PTMs in the case of label noise. We experiment on UCF101, where CLIP’s zero-shot learning performance is comparatively lower, showing a 53.5% accuracy boost. While significantly improving, it slightly lags behind the two datasets in Tab. 5, validating our analysis.

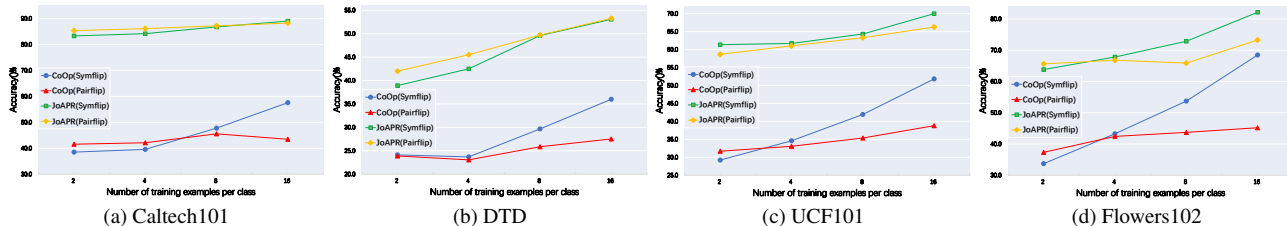

Figure 7. The Few-shot curves for four datasets under 50% noise.

## E. Few-shot Learning Analysis

As shown in Fig. 7, JoAPR significantly enhances the robustness of CoOp across various shot and noise types at a noise rate of 50%.

## F. Utilization in PLOT

For better generalization validation, we compare it with PLOT [5]. As depicted in Tab. 6, JoAPR enhances the robustness not only of CoOp and CoCoOp but also of PLOT.

## G. More discussion

While JoAPR has significantly enhanced the robustness of prompt learning methods for VL-PTMs, it is essential to acknowledge that JoAPR takes approximately two to three times more time than the baseline due to “partition and correction”.

## H. Additional Details on Training Procedures

The configuration of Warmup epochs and  $\alpha_1$  across nine datasets is detailed in Tab. 7. Specifically for Food101N, the Warmup epoch is configured to 1 and  $\alpha_1$  is set at 0.5, with  $-\mathcal{H}$  being utilized in lieu of  $\mathcal{L}_R$  during the retraining phase. It’s important to note that fitting samples in some datasets can be challenging. Therefore, we opt for an increased number of epochs or lower penalty coefficients in

the Warmup phase, particularly when dealing with a low noise ratio.

## I. Illustrative Examples of Noisy Samples

In Fig. 8, we display the noisy samples in Food101N as classified by JoAPR, illustrating their original labels (in red) and the refurbished labels post JoAPR’s modification (in blue). As Food101N is a dataset for fine-grained classification, it requires a more advanced capability to discern between noisy and clean data. Despite these complexities, the efficacy of JoAPR in accurately identifying and refurbishing these labels is remarkably evident.

Table 6. Comparison with PLOT

| Dataset    | Noise Type<br>Method\Noise Ratio | Symflip      |              |              | Pairflip     |              |              |
|------------|----------------------------------|--------------|--------------|--------------|--------------|--------------|--------------|
|            |                                  | 25.0%        | 50.0%        | 75.0%        | 25.0%        | 50.0%        | 75.0%        |
| Caltech101 | PLOT                             | 78.10        | 65.33        | 41.20        | 76.57        | 45.93        | 14.70        |
|            | <b>JoAPR</b>                     | <b>88.87</b> | <b>87.90</b> | <b>83.27</b> | <b>91.47</b> | <b>91.40</b> | <b>89.40</b> |
| Flowers102 | PLOT                             | 85.30        | 73.43        | 44.67        | 80.47        | 45.33        | 9.13         |
|            | <b>JoAPR</b>                     | <b>90.37</b> | <b>85.97</b> | <b>76.33</b> | <b>89.33</b> | <b>76.00</b> | <b>60.57</b> |
| OxfordPets | PLOT                             | 73.60        | 58.07        | 28.67        | 71.70        | 42.63        | 13.20        |
|            | <b>JoAPR</b>                     | <b>86.90</b> | <b>88.10</b> | <b>88.30</b> | <b>88.53</b> | <b>88.77</b> | <b>86.33</b> |
| DTD        | PLOT                             | 54.67        | 42.13        | 23.87        | 51.33        | 30.50        | 10.17        |
|            | <b>JoAPR</b>                     | <b>59.13</b> | <b>56.40</b> | <b>49.13</b> | <b>59.03</b> | <b>54.40</b> | <b>46.70</b> |

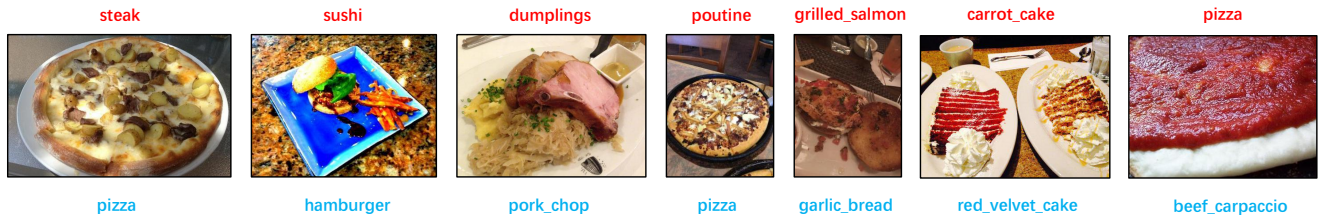

Figure 8. The visualization of label refurbishment by JoAPR in Food101N dataset noisy samples.

Table 7. The settings of Warmup epochs and  $\alpha_1$ .

| Dataset      | Noise Type<br>Config\Noise Ratio | Symflip |       |       |       |       |       | Pairflip |       |       |       |       |       |
|--------------|----------------------------------|---------|-------|-------|-------|-------|-------|----------|-------|-------|-------|-------|-------|
|              |                                  | 12.5%   | 25.0% | 37.5% | 50.0% | 62.5% | 75.0% | 12.5%    | 25.0% | 37.5% | 50.0% | 62.5% | 75.0% |
| ImageNet     | Warmup epochs                    | 1       | 1     | 1     | 1     | 1     | 1     | 1        | 1     | 1     | 1     | 1     | 1     |
|              | $\alpha_1$                       | 0.5     | 0.5   | 0.5   | 0.5   | 0.5   | 0.5   | 0.5      | 0.5   | 0.5   | 0.5   | 0.5   | 0.5   |
| SUN397       | Warmup epochs                    | 1       | 1     | 1     | 1     | 1     | 1     | 1        | 1     | 1     | 1     | 1     | 1     |
|              | $\alpha_1$                       | 0.5     | 0.5   | 0.5   | 0.5   | 0.5   | 0.5   | 0.5      | 0.5   | 0.5   | 0.5   | 0.5   | 0.5   |
| Caltech101   | Warmup epochs                    | 1       | 1     | 1     | 1     | 1     | 1     | 1        | 1     | 1     | 1     | 1     | 1     |
|              | $\alpha_1$                       | 0.5     | 0.5   | 0.5   | 0.5   | 0.5   | 0.5   | 0.5      | 0.5   | 0.5   | 0.5   | 0.5   | 0.5   |
| StanfordCars | Warmup epochs                    | 1       | 1     | 1     | 1     | 1     | 1     | 1        | 1     | 1     | 1     | 1     | 1     |
|              | $\alpha_1$                       | 0.5     | 0.5   | 0.5   | 0.5   | 0.5   | 0.5   | 0.5      | 0.5   | 0.5   | 0.5   | 0.5   | 0.5   |
| OxfordPets   | Warmup epochs                    | 1       | 1     | 1     | 1     | 1     | 1     | 1        | 1     | 1     | 1     | 1     | 1     |
|              | $\alpha_1$                       | 0.2     | 0.2   | 0.2   | 0.2   | 0.2   | 0.2   | 0.2      | 0.2   | 0.2   | 0.2   | 0.2   | 0.2   |
| DTD          | Warmup epochs                    | 1       | 1     | 1     | 1     | 1     | 1     | 1        | 1     | 1     | 1     | 1     | 1     |
|              | $\alpha_1$                       | 0.2     | 0.2   | 0.2   | 0.2   | 0.2   | 0.2   | 0.2      | 0.2   | 0.2   | 0.2   | 0.2   | 0.1   |
| EuroSAT      | Warmup epochs                    | 10      | 10    | 10    | 1     | 1     | 1     | 10       | 10    | 10    | 10    | 1     | 1     |
|              | $\alpha_1$                       | 0.2     | 0.2   | 0.2   | 0.2   | 0.2   | 0.1   | 0.2      | 0.2   | 0.2   | 0.2   | 0.2   | 0.1   |
| Flowers102   | Warmup epochs                    | 20      | 20    | 20    | 20    | 20    | 20    | 20       | 20    | 20    | 1     | 1     | 1     |
|              | $\alpha_1$                       | 0.5     | 0.5   | 0.5   | 0.5   | 0.5   | 0.5   | 0.5      | 0.5   | 0.5   | 0.5   | 0.5   | 0.5   |
| UCF101       | Warmup epochs                    | 20      | 20    | 20    | 20    | 20    | 1     | 20       | 20    | 1     | 1     | 1     | 1     |
|              | $\alpha_1$                       | 0.5     | 0.5   | 0.5   | 0.5   | 0.5   | 0.5   | 0.5      | 0.5   | 0.5   | 0.5   | 0.5   | 0.5   |
